# Supplementary material for: A chemically bonded NaTi2(PO4)3/rGO microsphere composite as a high-rate insertion anode for sodium-ion capacitors
Source: Royal Society of Chemistry journal article supplement (doi:10.1039/c7ta05252a), 2017-01-01
Supplement: c7ta05252a2.pdf [file c7ta05252a2.pdf]

## **Electronic Supplementary Information (ESI)**

### **Chemically Bonded NaTi<sub>2</sub>(PO<sub>4</sub>)<sub>3</sub>/rGO Microsphere Composite as High-Rate Insertion Anode for Sodium-Ion Capacitor**

Ha-Kyung Roh,<sup>a</sup> Myeong-Seong Kim,<sup>a</sup> Kyung Yoon Chung,<sup>b</sup> Mani Ulaganathan<sup>c</sup>,  
Vanchiappan Aravindan,<sup>\*c</sup> Srinivasan Madhavi<sup>c</sup>, Kwang Chul Roh,<sup>\*d</sup> and Kwang-Bum Kim<sup>\*a</sup>

<sup>a</sup>Department of Material Science & Engineering, Yonsei University, 50 Yonsei-ro, Seodaemun-gu, Seoul 03722, Republic of Korea. E-mail: kbkim@yonsei.ac.kr

<sup>b</sup>Center for Energy Convergence, Korea Institute of Science and Technology, 5, Hwarang-ro 14-gil, Seongbuk-gu, Seoul 02792, Republic of Korea

<sup>c</sup>Energy Research Institute@NTU (ERI@N), Nanyang Technological University, Research Techno Plaza, Singapore 637553, Singapore. E-mail: aravind\_van@yahoo.com

<sup>d</sup>Energy & Environmental Division, Korea Institute of Ceramic Engineering & Technology, 101 Soho-ro, Jinju-si, Gyeongsangnam-do 52851, Republic of Korea. E-mail: rkc@kicet.re.kr

## Supplementary Table

|                                                        | wt.% of elements from elemental analysis |          |          |
|--------------------------------------------------------|------------------------------------------|----------|----------|
| NaTi <sub>2</sub> (PO <sub>4</sub> ) <sub>3</sub> /rGO | Carbon                                   | Hydrogen | Nitrogen |
|                                                        | 2.06                                     | 0.02     | 0.11     |

**Table S1.** Elemental analysis of a 3D NaTi<sub>2</sub>(PO<sub>4</sub>)<sub>3</sub>/rGO microsphere composite.

|                    | R <sub>s</sub> | R <sub>ct</sub> |
|--------------------|----------------|-----------------|
| Fresh cell         | 8.07           | 20.85           |
| After 250th cycle  | 9.48           | 23.09           |
| After 500th cycle  | 9.15           | 22.89           |
| After 1000th cycle | 8.95           | 23.35           |
| After 5000th cycle | 8.59           | 24.36           |

**Table S2.** Fitting values of equivalent circuit elements of the NaTi<sub>2</sub>(PO<sub>4</sub>)<sub>3</sub>/rGO microsphere composite//AC NHC electrode.

## Supplementary Figures

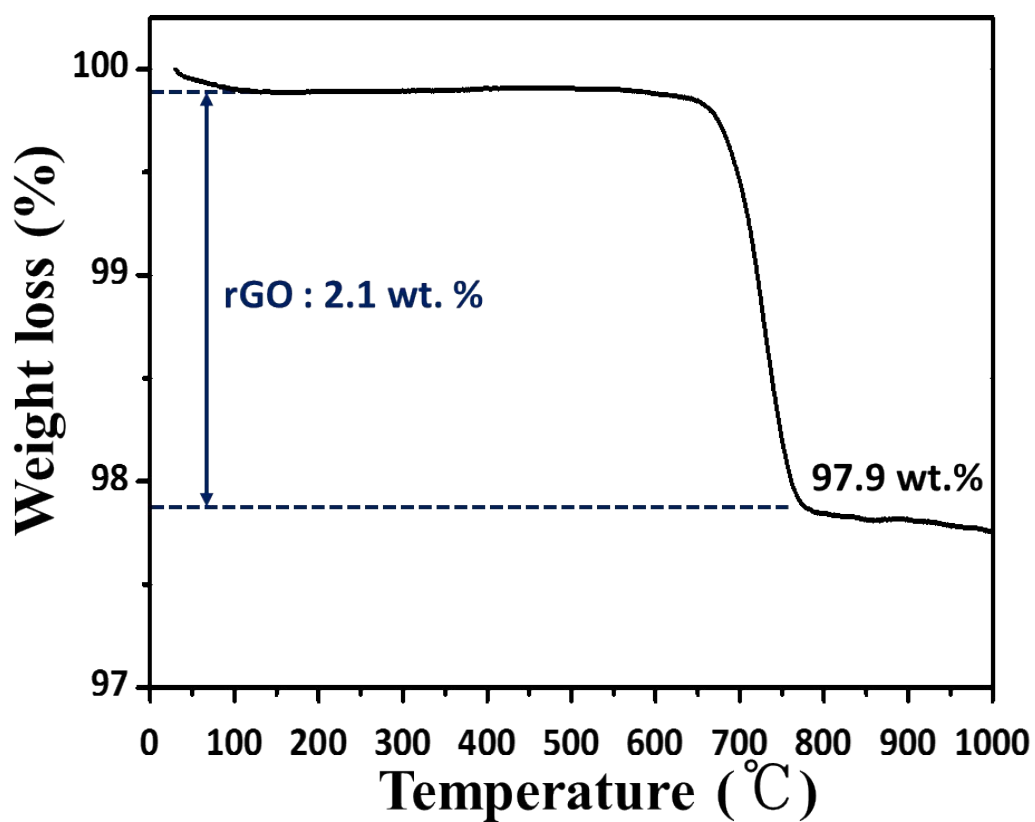

**Fig. S1** TGA of NaTi<sub>2</sub>(PO<sub>4</sub>)<sub>3</sub>/rGO microsphere composite, heated from room temperature to 1000 °C at 10 °C min<sup>-1</sup> under air flow. From TGA the loading amount of NaTi<sub>2</sub>(PO<sub>4</sub>)<sub>3</sub> in the NaTi<sub>2</sub>(PO<sub>4</sub>)<sub>3</sub>/rGO microsphere composite was determined to be 97.9 wt.%.

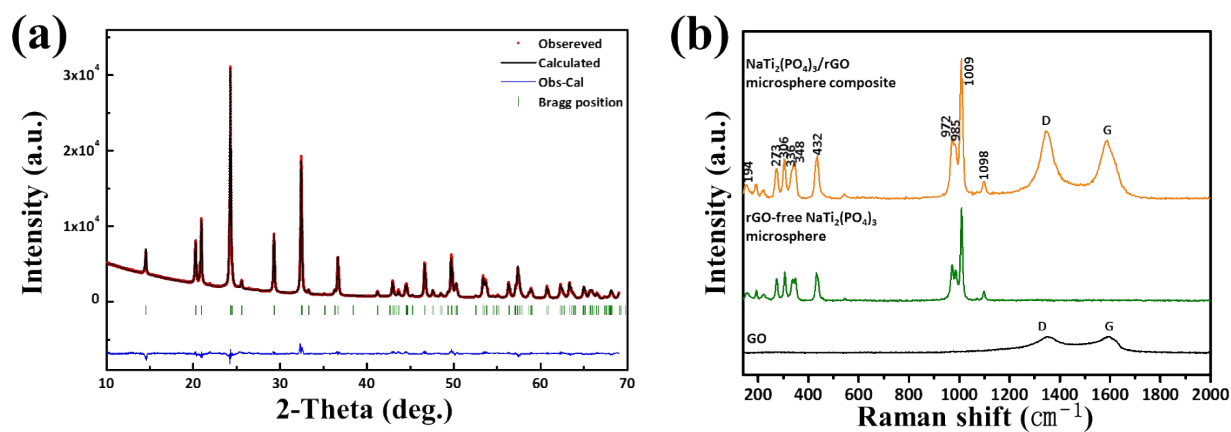

**Fig. S2** (a) Rietveld refinement of the XRD pattern of  $\text{NaTi}_2(\text{PO}_4)_3/\text{rGO}$  microsphere composite with NASICON structure, (b) Raman spectra of GO, rGO-free  $\text{NaTi}_2(\text{PO}_4)_3$  microsphere and  $\text{NaTi}_2(\text{PO}_4)_3/\text{rGO}$  microsphere composite.

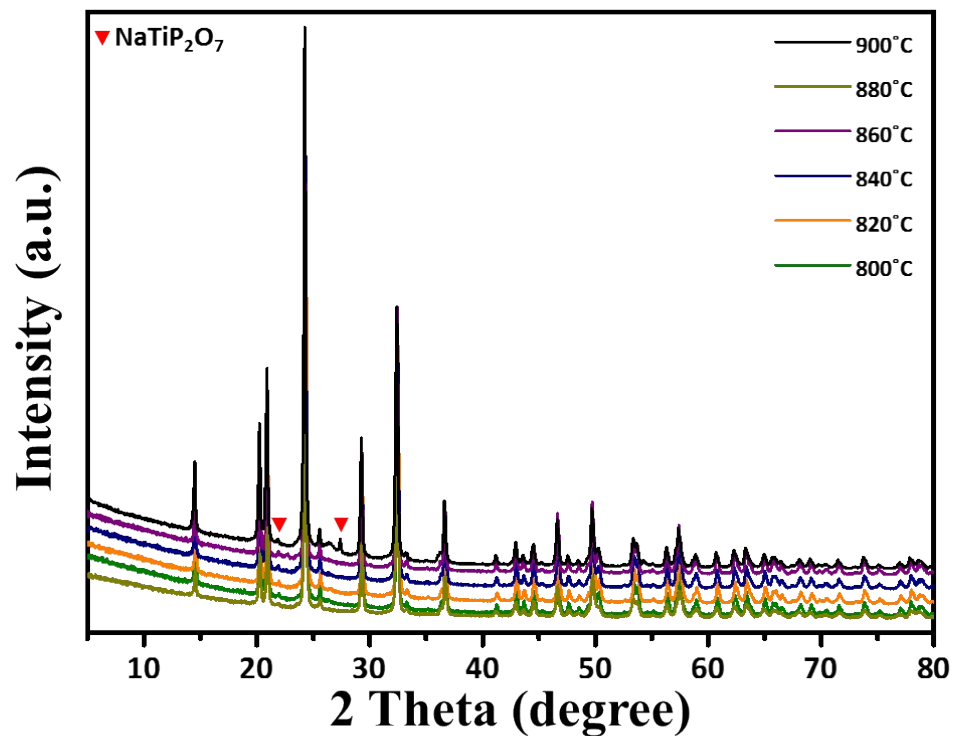

**Fig. S3** X-ray diffraction patterns of  $\text{NaTi}_2(\text{PO}_4)_3/\text{rGO}$  microsphere composite at temperatures of 800, 820, 840, 860, 880 and 900 °C.

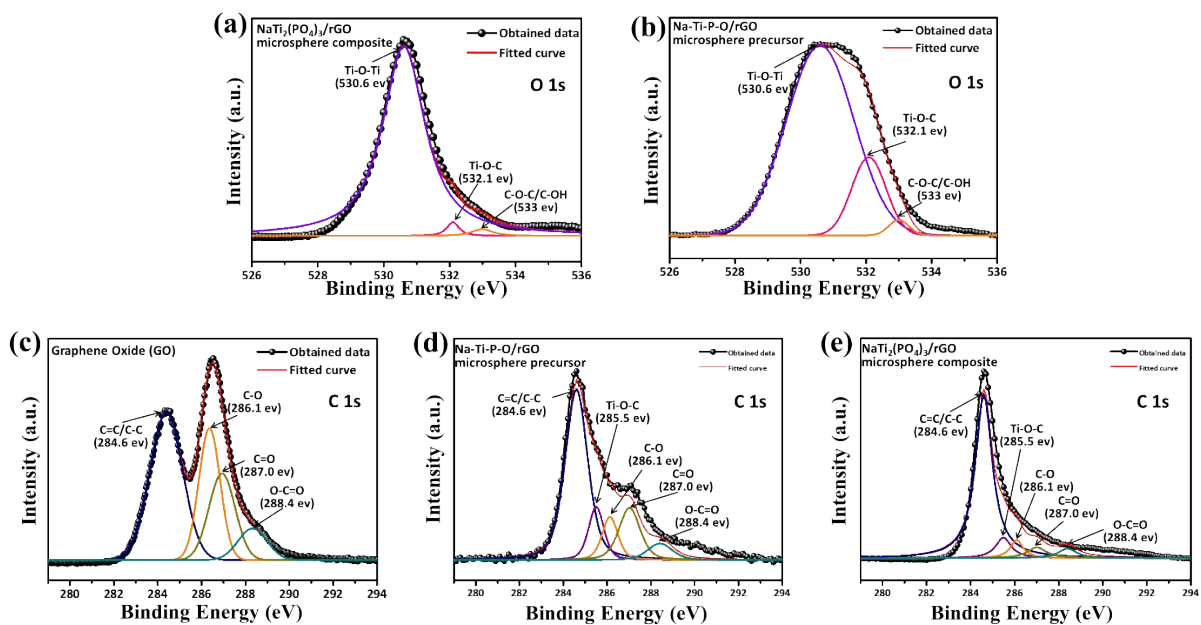

**Fig. S4** XPS O 1s spectra of (a) Na-Ti-P-O/rGO microsphere precursor, (b) NaTi<sub>2</sub>(PO<sub>4</sub>)<sub>3</sub>/rGO microsphere composite; XPS C 1s spectra of (c) GO, (d) Na-Ti-P-O/rGO microsphere precursor and (e) NaTi<sub>2</sub>(PO<sub>4</sub>)<sub>3</sub>/rGO microsphere composite.

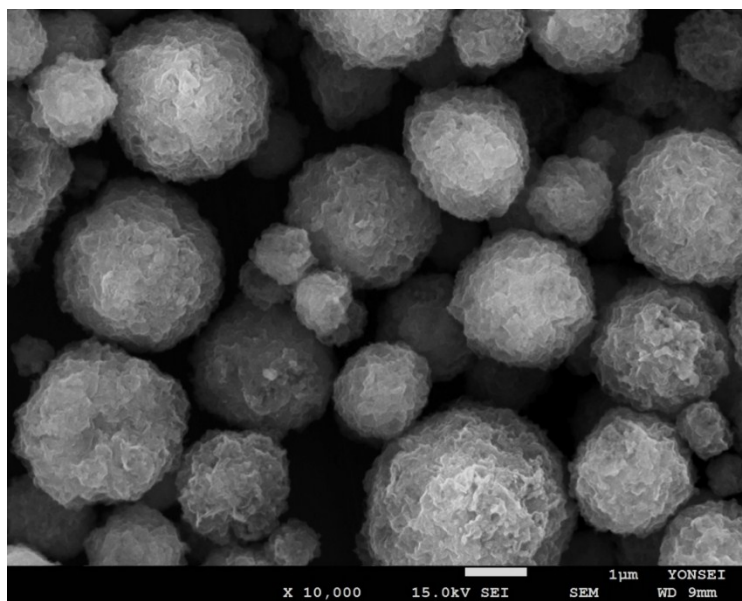

**Fig. S5** Low-magnification SEM image of  $\text{NaTi}_2(\text{PO}_4)_3/\text{rGO}$  microsphere composite.

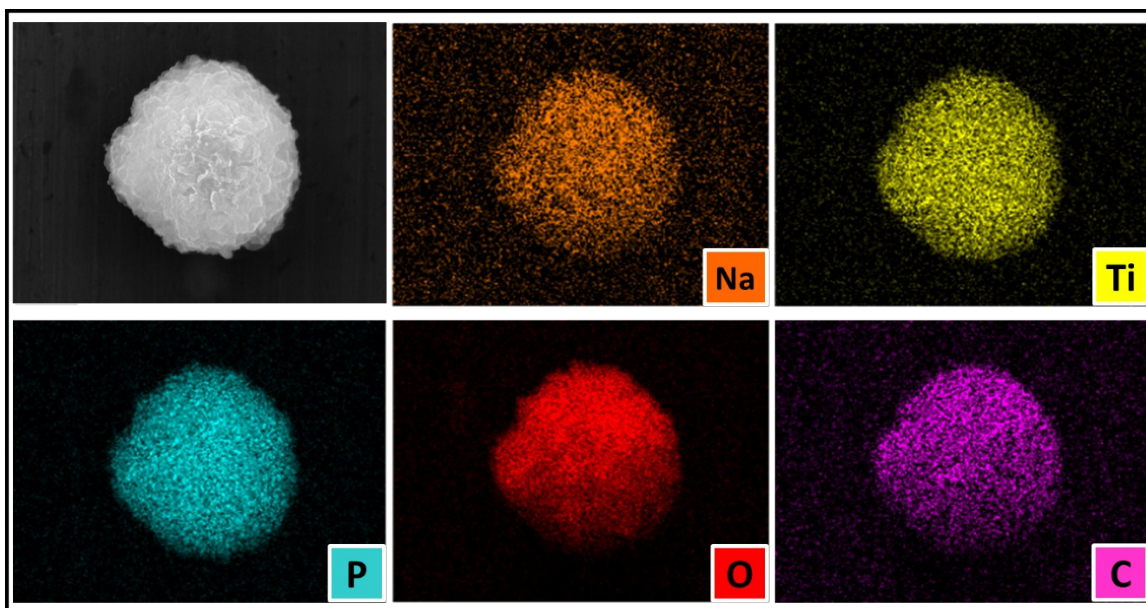

**Fig. S6** Typical SEM image of  $\text{NaTi}_2(\text{PO}_4)_3/\text{rGO}$  microspheres composite and corresponding elemental mapping of sodium (orange), titanium (yellow), phosphate (blue), oxygen (red), and carbon (pink). EDS elemental mapping shows even distribution of Na, Ti, P, and O, suggesting that  $\text{NaTi}_2(\text{PO}_4)_3$  particles are uniformly distributed in the composite.



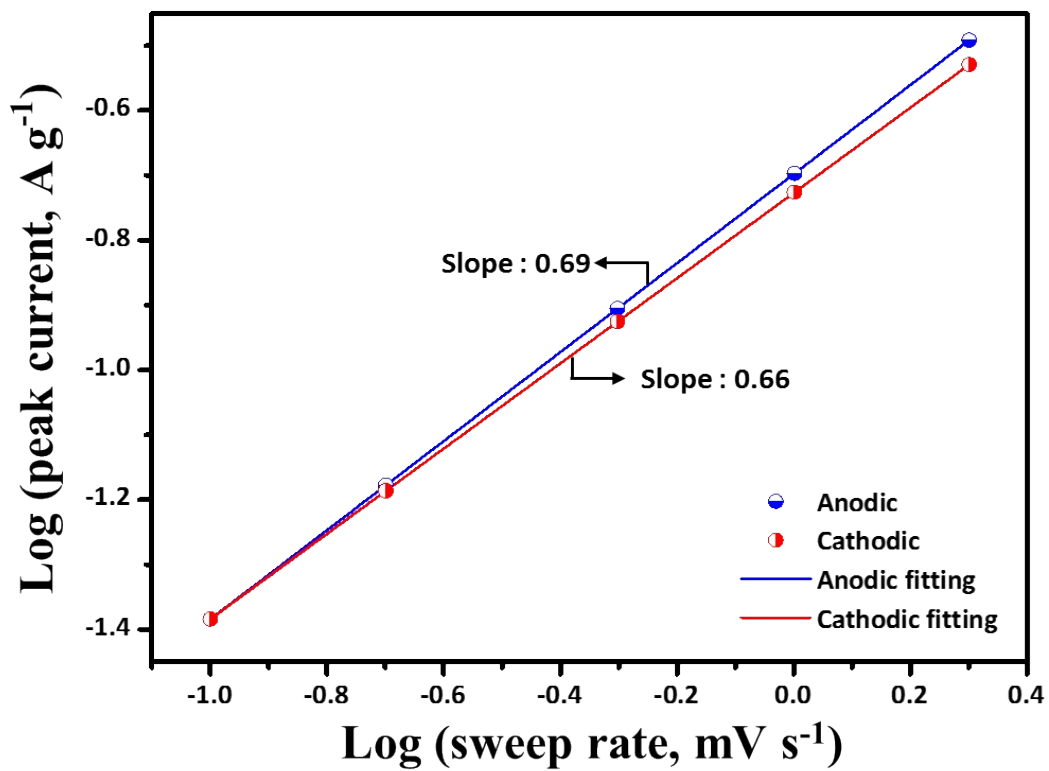

**Fig. S7** A plot of log (peak current) vs. log (potential scan rate) for NaTi<sub>2</sub>(PO<sub>4</sub>)<sub>3</sub>/rGO microsphere composite.

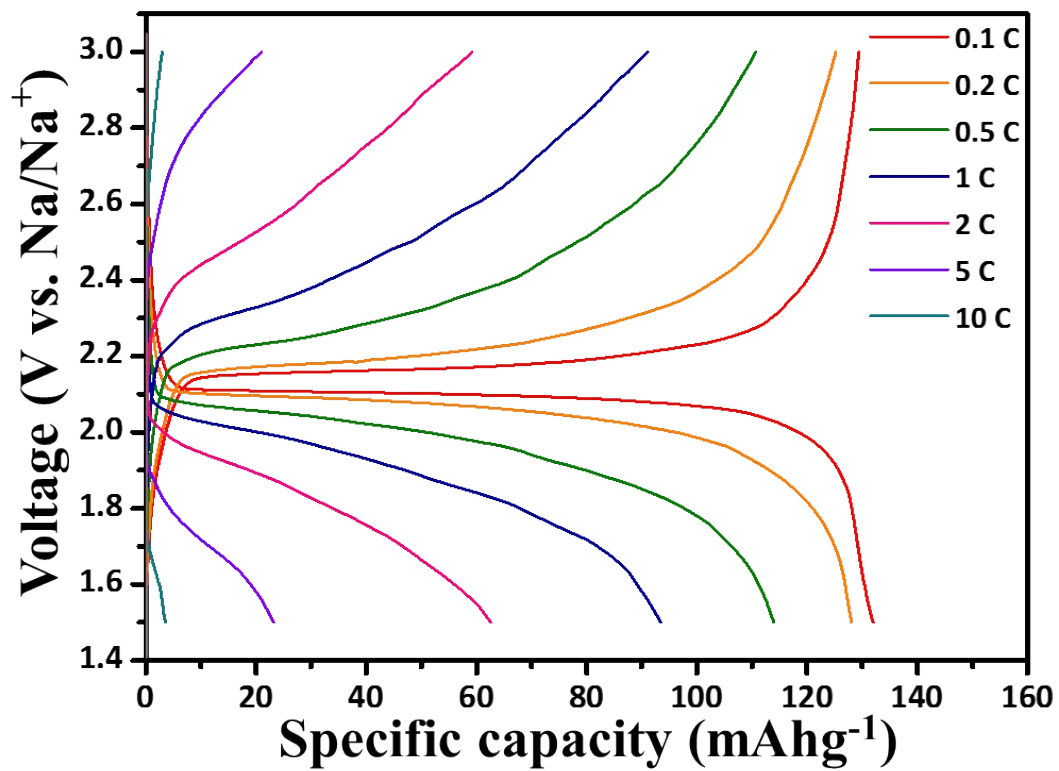

**Fig. S8** Discharge/charge profiles of rGO-free NaTi<sub>2</sub>(PO<sub>4</sub>)<sub>3</sub> microsphere at increasing C-rate from 0.1 C to 10 C.

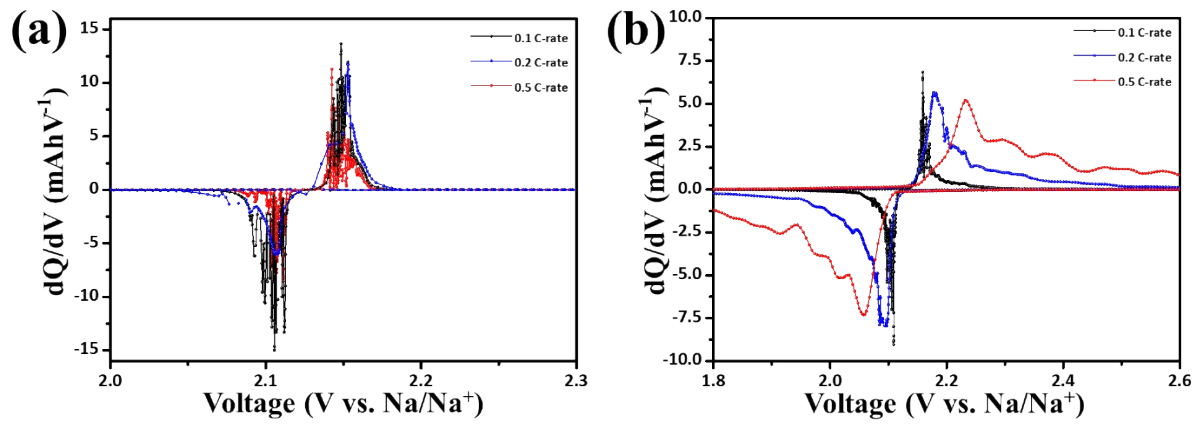

**Fig. S9** Differential capacity ( $dQ/dV$ ) vs. voltage profiles of (a)  $\text{NaTi}_2(\text{PO}_4)_3/\text{rGO}$  microsphere composite and (b) rGO-free  $\text{NaTi}_2(\text{PO}_4)_3$  microsphere at 0.1, 0.2 and 0.5 C-rate.

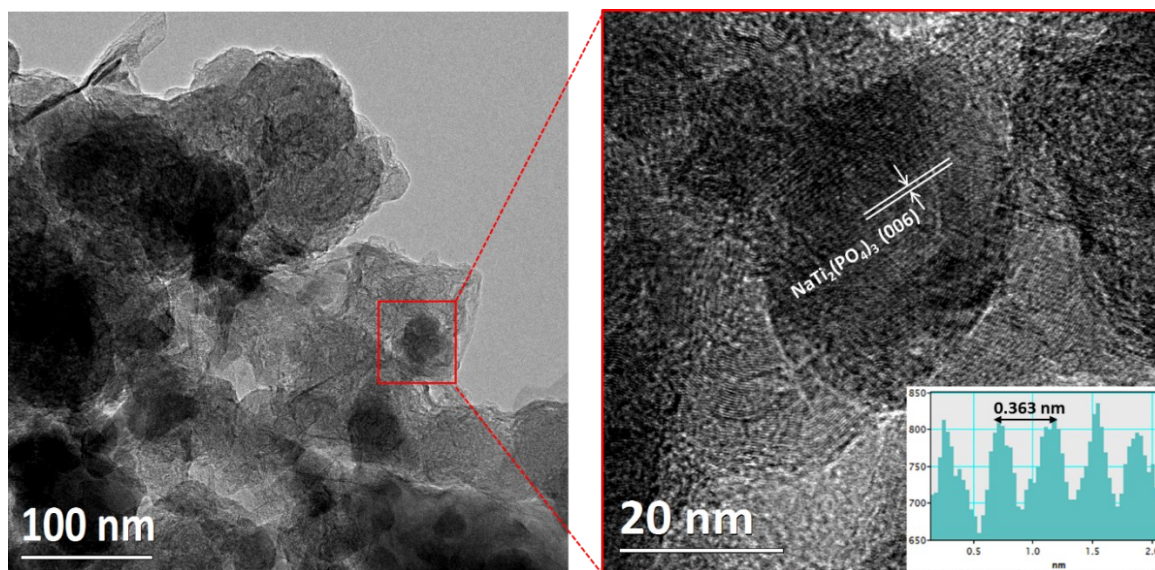

**Fig. S10** TEM and HR-TEM images of  $\text{NaTi}_2(\text{PO}_4)_3/\text{rGO}$  microsphere composite after 200 cycles at 10 C. HR-TEM image shows clear lattice fringes with a d-spacing of 0.363 nm, which corresponds to the (006) plane spacing of  $\text{NaTi}_2(\text{PO}_4)_3$ , demonstrating that crystallinity of the  $\text{NaTi}_2(\text{PO}_4)_3$  nanoparticles was well retained in the composite after 200 cycles at 10 C-rate.

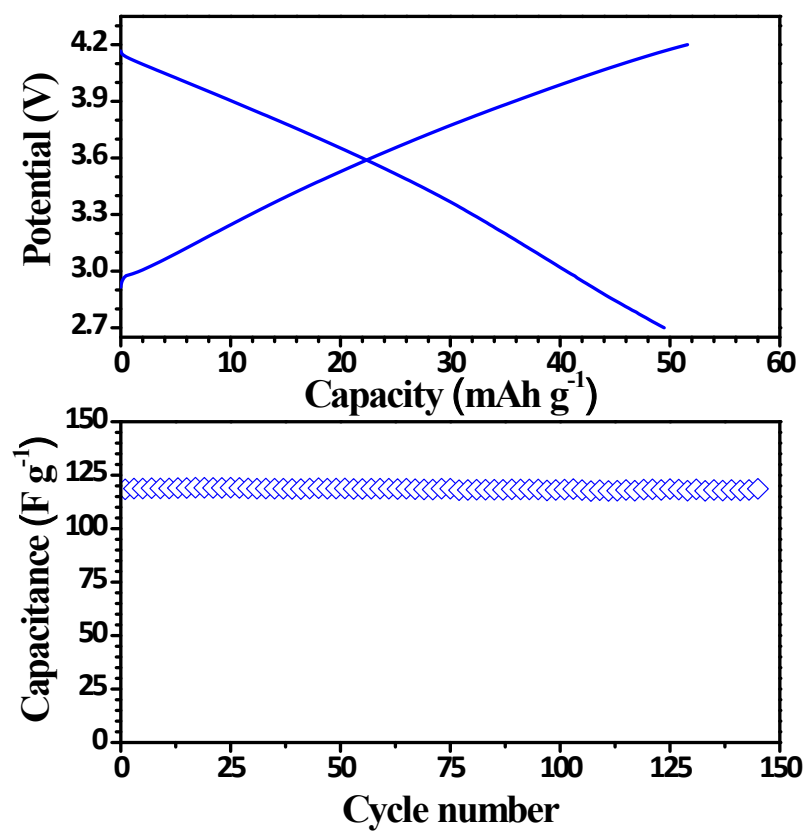

**Fig. S11** Galvanostatic charge-discharge profiles and cycling stability of activated carbon (AC) measured between 2.7 and 4.2 V in 1 M NaClO<sub>4</sub> in PC with 5 wt.% FEC at a current density of 100 mA g<sup>-1</sup>.

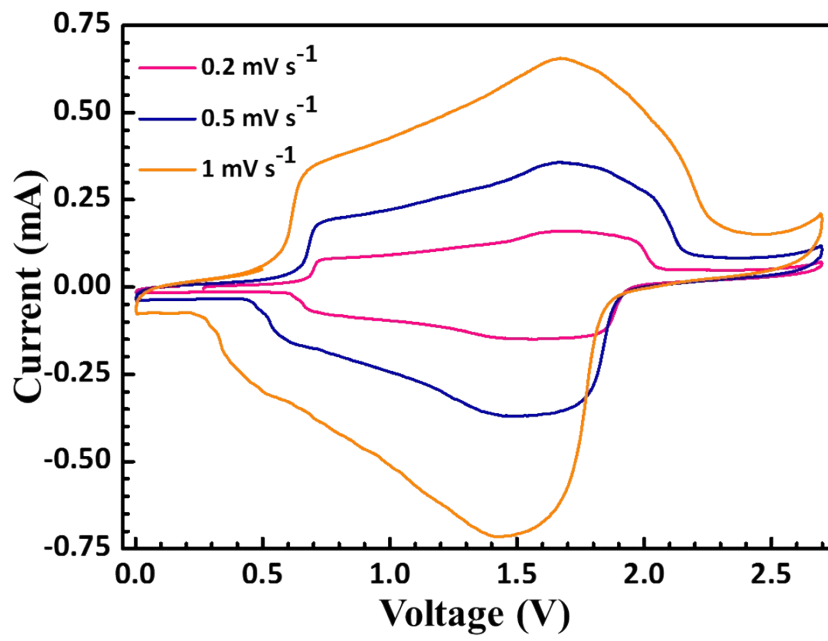

**Fig. S12** Cyclic voltammograms of the NaTi<sub>2</sub>(PO<sub>4</sub>)<sub>3</sub>/rGO microspheres composite/AC sodium-ion hybrid capacitor (NHC) at various scan rates.
